# Supplementary material for: Assessment of Awake Prone Positioning in Hospitalized Adults With COVID-19: A Nonrandomized Controlled Trial
Source: PubMed Central journal article supplement (PMC9016608; doi:10.1001/jamainternmed.2022.1070), 2022-04-18
Supplement: jamainternmed-e221070-s003.pdf [file jamainternmed-e221070-s003.pdf]

Supplemental Online Content: Nonauthor Collaborators

\*Indicates required information. Only first name, last name, and suffix will appear in PubMed.

| <b>*Group Name(s):</b> Vanderbilt Learning Healthcare System Platform Investigators |                   |                              |                  |             |                                          |                                                         |                                                                                            |
|-------------------------------------------------------------------------------------|-------------------|------------------------------|------------------|-------------|------------------------------------------|---------------------------------------------------------|--------------------------------------------------------------------------------------------|
| <b>*First Name and Middle Initial(s)</b>                                            | <b>*Last Name</b> | <b>*Suffix (eg, Jr, III)</b> | Academic Degrees | Institution | Location (city, state/province, country) | Role or Contribution, eg, chair, principal investigator | Group (if more than 1 Group listed in the byline) and/or Subgroup (eg, Steering Committee) |
| Robert                                                                              | Dittus            |                              |                  |             |                                          |                                                         |                                                                                            |
| Shon                                                                                | Dwyer             |                              |                  |             |                                          |                                                         |                                                                                            |
| Paul                                                                                | Harris            |                              |                  |             |                                          |                                                         |                                                                                            |
| Tina                                                                                | Hartert           |                              |                  |             |                                          |                                                         |                                                                                            |
| Jim                                                                                 | Hayman            |                              |                  |             |                                          |                                                         |                                                                                            |
| Catherine                                                                           | Ivory             |                              |                  |             |                                          |                                                         |                                                                                            |
| Kevin                                                                               | Johnson           |                              |                  |             |                                          |                                                         |                                                                                            |
| Ruth                                                                                | Kleinpell         |                              |                  |             |                                          |                                                         |                                                                                            |
| Lee Ann                                                                             | Liska             |                              |                  |             |                                          |                                                         |                                                                                            |
| Patrick                                                                             | Luther            |                              |                  |             |                                          |                                                         |                                                                                            |
| Jay                                                                                 | Morrison          |                              |                  |             |                                          |                                                         |                                                                                            |
| Thomas                                                                              | Nantais           |                              |                  |             |                                          |                                                         |                                                                                            |
| Mariann                                                                             | Piano             |                              |                  |             |                                          |                                                         |                                                                                            |
| Kris                                                                                | Rhem              |                              |                  |             |                                          |                                                         |                                                                                            |
| Russell                                                                             | Rothman           |                              |                  |             |                                          |                                                         |                                                                                            |
| Matt                                                                                | Semler            |                              |                  |             |                                          |                                                         |                                                                                            |
| Robin                                                                               | Steaban           |                              |                  |             |                                          |                                                         |                                                                                            |
| Philip                                                                              | Walker            |                              |                  |             |                                          |                                                         |                                                                                            |
| Consuelo                                                                            | Wilkins           |                              |                  |             |                                          |                                                         |                                                                                            |
| Adam                                                                                | Wright            |                              |                  |             |                                          |                                                         |                                                                                            |
| Autumn                                                                              | Zuckerman         |                              |                  |             |                                          |                                                         |                                                                                            |
