# Supplementary material for: Assessment of Awake Prone Positioning in Hospitalized Adults With COVID-19: A Nonrandomized Controlled Trial
Source: PubMed Central journal article supplement (PMC9016608; doi:10.1001/jamainternmed.2022.1070), 2022-04-18
Supplement: jamainternmed-e221070-s004.pdf [file jamainternmed-e221070-s004.pdf]

## Data Sharing Statement

Qian. Assessment of Awake Prone Positioning in Hospitalized Adults With COVID-19. *JAMA Intern Med*. Published April 18, 2022. doi:10.1001/jamainternmed.2022.1070

### Data

**Data available:** Yes

**Data types:** Deidentified participant data, Data dictionary, Other (please specify)

**Additional Information:** Statistical analysis plan and analytic code will also be shared. The data will become available 3 months following publication of outcomes and will remain available for at least 5 years.

**How to access data:** Data will be made available to researchers who provide a methodologically sound proposal that has been approved by the Vanderbilt Institutional Review Board and the study executive committee.

**When available:** With publication

### Supporting Documents

**Document types:** None

### Additional Information

**Who can access the data:** Data will be made available to researchers who provide a methodologically sound proposal that has been approved by the Vanderbilt Institutional Review Board and the study executive committee.

**Types of analyses:** Data will be made available to researchers who provide a methodologically sound proposal that has been approved by the Vanderbilt Institutional Review Board and the study executive committee.

**Mechanisms of data availability:** Data will be made available to researchers who provide a methodologically sound proposal that has been approved by the Vanderbilt Institutional Review Board and the study executive committee.
